# Supplementary material
Source: publisher site journal article supplement (https://www.dovepress.com/article/365443)
Supplement: Supplementary file 1 [file get_supplementary_file.php]

**Supplementary Table 1.** The sensitivity and specificity of HIV1/2 rapid tests used in this study

| **Order** | **HIV 1/2 rapid tests** | **Use** | *Sensitivity* | *Specificity* |
| --- | --- | --- | --- | --- |
| 1st | Wantai (Beijing Wantai Biological Pharmacy Enterprise Co., Ltd., China) | screening | 100% | 98.4% |
| 2nd | Uni-GoldTM (TrinityBiotech PLC, Bray, Ireland) | confirmatory | 99.8% | 99.9 |
| 3rd | VIKIA® HIV 1/2 (bioMérieux SA, France) | tiebreaker | 99.6 | 99.7 |
